# Supplementary material
Source: PubMed Central journal article supplement (PMC3497658)
Supplement: JVI.01939-12_zjv999096872so1.pdf [file JVI.01939-12_zjv999096872so1.pdf]

1 **Structure of hepatitis C virus envelope glycoprotein E2 antigenic site 412-423 in complex with**  
2 **antibody AP33**

3 **Running title:** Structure of HCV E2 antigenic site 412-423

4

5 Leopold Kong<sup>a</sup>, Erick Giang<sup>b</sup>, Travis Nieuwma<sup>a</sup>, Justin B. Robbins<sup>b</sup>, Marc C. Deller<sup>a,d</sup>, Robyn L.  
6 Stanfield<sup>a</sup>, Ian A. Wilson<sup>a,c,d,1</sup>, and Mansun Law<sup>b,1</sup>

7

8 Departments of <sup>a</sup>Molecular Biology and <sup>b</sup>Immunology and Microbial Science, and <sup>c</sup>The Skaggs Institute  
9 for Chemical Biology, The Scripps Research Institute, La Jolla, CA 92037. <sup>d</sup>Joint Center for Structural  
10 Genomics, <http://www.jcsg.org>, USA.

11

12 <sup>1</sup>To whom correspondence may be addressed. E-mail: [wilson@scripps.edu](mailto:wilson@scripps.edu) or [mlaw@scripps.edu](mailto:mlaw@scripps.edu)

13

14 Data deposition: The atomic coordinates have been deposited in the Protein Data Bank, [www.pdb.org](http://www.pdb.org)  
15 (PDB ID code 4G6A).

16

17

18

19

20

## 21 SUPPLEMENTAL MATERIALS

22

### 23 Supplemental materials and methods.

#### 24 Antibody production

25 The V<sub>H</sub> and V<sub>L</sub> domains of antibody AP33 were fused with human C<sub>H</sub>1-3 and C<sub>L</sub> as a murine-human  
26 chimeric antibody using the pIgG1 vector for high-level protein expression (10). This chimeric antibody  
27 is referred as MAb huAP33 here to distinguish it from the original mouse MAb discovered by Patel and  
28 co-workers (16). The chimeric antibody bound E1E2, and the binding could be inhibited using linear  
29 peptides encoding the proposed antigenic site (Fig. S1). The MAb also neutralized HCV as expected (Fig.  
30 S1). To prepare the Fab fragment for crystallization studies, C<sub>H</sub>2-3 domains in the expression vector were  
31 deleted and soluble Fab was produced by transient transfection of 293F cells with the recombinant DNA.  
32 The Fab was purified by affinity chromatography using a rabbit anti-human Fab antibody column  
33 followed by passage through a monoS 10/100 GL cation exchange column (GE Healthcare). The primary  
34 peak was then further purified using size exclusion chromatography with a Superdex 200 (GE Healthcare)  
35 column.

36

#### 37 Complex formation and crystallization using iterative micro-batch seeding

38 The AP33 Fab was concentrated to 8-12 mg/mL using an Amicon centrifugal ultrafiltration unit  
39 (Millipore) with a 10 kDa molecular weight cutoff. The concentrated Fab and the R12 peptide encoding  
40 the antigenic site (9) were incubated at a 1:10 molar ratio overnight at 4°C in 150 mM NaCl, 20 mM Tris-  
41 HCl pH 7.2 to form the complex. Samples were screened for crystallization using the 384 conditions of  
42 the JCSG Core Suite (Qiagen) at both 277 and 293 K using the JCSG robotic Crystallation system  
43 (Rigaku). Crystallization was performed using the nanodroplet vapor diffusion method (17) with standard  
44 JCSG crystallization protocols (11). Sitting drops composed of 200 nl of protein sample were mixed with  
45 200 nl of crystallization reagent in a sitting drop format and were equilibrated against a 50 µl reservoir of  
46 crystallization reagent. After approximately 3 days at 20°C, thin bundles of needle-shaped crystals formed  
47 in 17% (w/v) PEG 4000, 8.5% (v/v) 2-propanol, 15% (v/v) glycerol and 0.085 M Sodium HEPES, pH 7.5  
48 (JCSG Core Suite 2, well B11). These initial crystals were too small for diffraction studies and were  
49 crushed in a Seed Bead tube (Hampton Research) for use in micro-batch seeding (5, 8). The crystals were  
50 placed into the Seed Bead tube containing 50 µl of mother liquor and then vortexed for 3 x 30 s, keeping  
51 the tube on ice between manipulations. Micro-batch seeding was carried out using sitting drops composed  
52 of 150 nl of protein, 100 nl of crystallization reagent and 50 nl of seed stock as implemented by an Oryx 8

53 robot (Douglas Instruments) and plates were incubated at 16°C. The crystallization reagent used in this  
54 first round of seeding consisted of a custom optimization screen centered on the initial crystallization hit  
55 with varying PEG4000 (5–27%, w/v) and 2-propanol (0.5–14.5%, v/v) concentration. Custom screens  
56 were formulated by an Alchemist robotic system (Rigaku). The first round of micro-batch seeding  
57 resulted in thin plate crystals that were unsuitable for diffraction studies. These plates were submitted to a  
58 further round of micro-batch seeding and improved hexagonal plates of diffraction quality were finally  
59 achieved in the same condition.

60

### 61 **Data collection**

62 The optimized, hexagonal crystals diffracted to 2.5Å at beamline 11-1 of the Stanford Synchrotron  
63 Radiation Lightsource (SSRL). Data were collected at 100 K to a completeness of 91% with an overall  
64  $R_{\text{sym}}$  of 10% (23% in the high resolution shell) (Table S1). Data were indexed, processed and scaled with  
65 HKL-2000 (15) in the monoclinic space group  $P2_1$  with unit cell parameters  $a = 44.9\text{Å}$ ,  $b = 191.8\text{Å}$ ,  $c =$   
66  $59.4\text{Å}$ ,  $\beta = 111.1^\circ$ .

67

### 68 **Structure Refinement**

69 The structure was determined by the molecular replacement method using Phaser (13) with the HCV1  
70 Fab structure (PDB ID: 4DGV) as an initial model. Model building was carried out using Coot-0.6.2 (6)  
71 and refinement was implemented with Phenix (1). Final  $R_{\text{cryst}}$  and  $R_{\text{free}}$  values are 17.8 % and 21.9 %,   
72 respectively. Buried molecular surface areas were analyzed with MS (4) using a 1.7 Å probe radius and  
73 standard van der Waals radii, and van der Waals contacts and hydrogen bonds were evaluated with  
74 CONTACTSYM (18, 19) and HBPLUS (14). Surface potential and electrostatics were calculated using  
75 APBS (2) and all structural visualizations were generated with PyMOL (The PyMOL Molecular Graphics  
76 System, Version 1.2r3pre, Schrödinger, LLC.). For the Fab, the residues were renumbered according to  
77 the Kabat scheme (12).

78

79

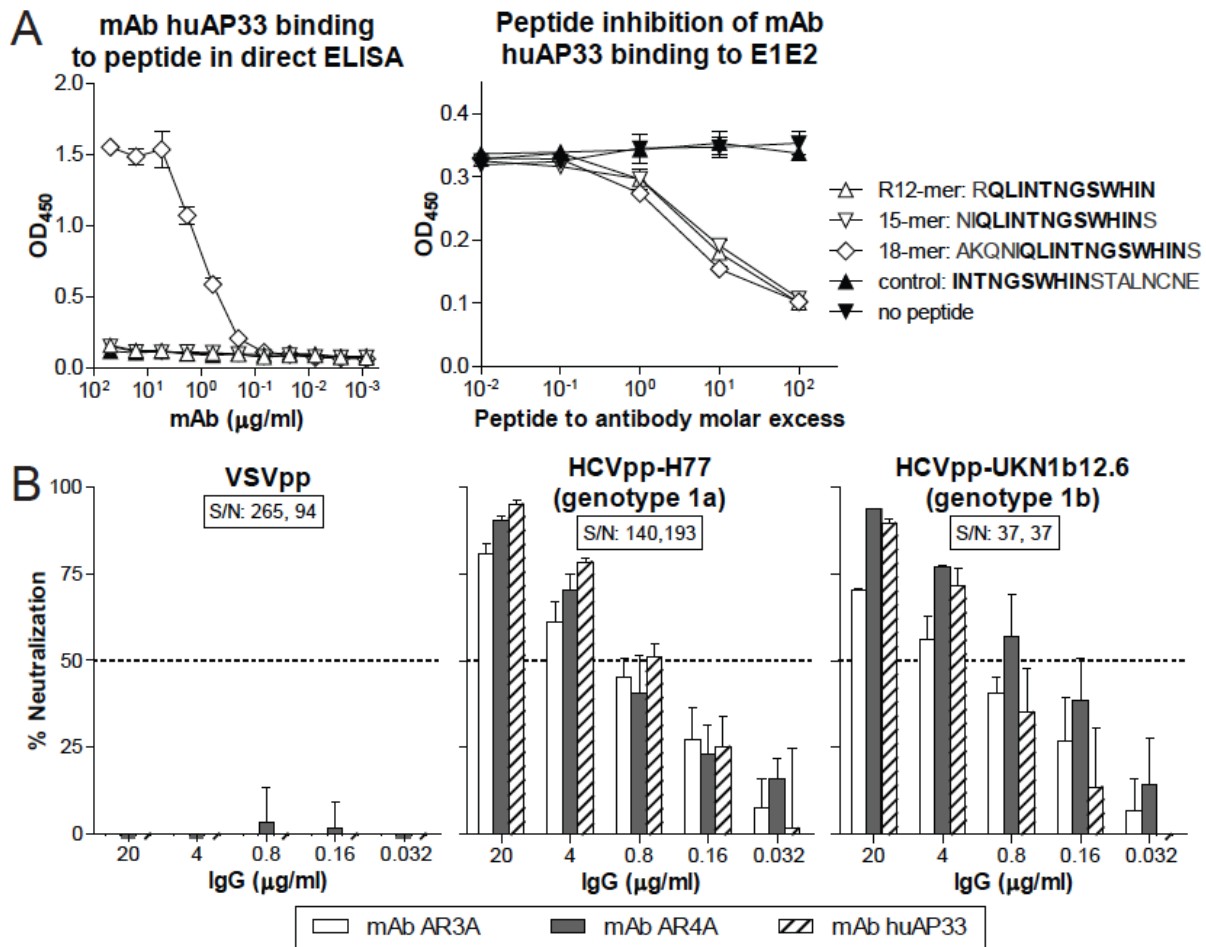

81  
 82 **FIG. S1.** Biological activities of recombinant mouse-human chimeric antibody AP33 (MAb huAP33).  
 83 (A) Peptide candidates for crystallography. The binding of MAb huAP33 to three candidate peptides  
 84 (R12-mer, 15-mer and 18-mer) was first evaluated by direct ELISA (left panel). The MAb only binds the  
 85 18-mer when the peptides were coated directly onto microwells. However, in solution, all 3 peptides  
 86 blocked antibody binding to E1E2 at similar levels (right panel). The epitope sequence is in bold and the  
 87 control peptide with truncated epitope sequence did not block MAb binding. The soluble R12-mer was  
 88 used in crystallization experiments. (B) Neutralization of HCV by MAb huAP33. The chimeric MAb  
 89 neutralized HCV pseudotype virus particles (HCVpp) displaying the genotype 1a or 1b E1E2, but not the  
 90 control envelope glycoprotein G from vesicular stomatitis virus (VSVpp). The mAbs AR3A and AR4A  
 91 are control neutralizing mAbs to E2 and the E1E2 complex, respectively (7).

93 **Table S1.** Data Collection and Refinement  
 94 Statistics for Fab AP33

|                                          |                                                   |
|------------------------------------------|---------------------------------------------------|
| Data collection                          | AP33 Fab                                          |
| Beamline                                 | SSRL11-1                                          |
| Wavelength (Å)                           | 0.98000                                           |
| Space group                              | P2 <sub>1</sub>                                   |
| Unit cell parameters                     | a = 44.9<br>b = 191.8<br>c = 59.4 Å<br>β = 111.1° |
| Resolution (Å)                           | 47.97-2.50<br>(2.54-2.50) <sup>a</sup>            |
| Observations                             | 188,654                                           |
| Unique reflections                       | 29,450 (966) <sup>a</sup>                         |
| Redundancy                               | 6.4 (4.4) <sup>a</sup>                            |
| Completeness (%)                         | 91.3 (61.3) <sup>a</sup>                          |
| $\langle I/\sigma_I \rangle$             | 16.0 (5.7) <sup>a</sup>                           |
| R <sub>sym</sub> <sup>b</sup>            | 0.10 (0.23) <sup>a, b</sup>                       |
| Refinement statistics                    |                                                   |
| Resolution (Å)                           | 47.97-2.50<br>(2.58-2.50)                         |
| Reflections (work)                       | 27,907 (1718)                                     |
| Reflections (test)                       | 1,502 (89)                                        |
| R <sub>cryst</sub> (%) <sup>c</sup>      | 17.8 <sup>c</sup> (23.3)                          |
| R <sub>free</sub> (%) <sup>d</sup>       | 22.0 <sup>d</sup> (32.0)                          |
| Average B-value (Å <sup>2</sup> )        | 34.1                                              |
| Wilson B-value (Å <sup>2</sup> )         | 32.5                                              |
| RMSD from ideal geometry                 |                                                   |
| Bond length (Å)                          | 0.003                                             |
| Bond angles (°)                          | 0.79                                              |
| Ramachandran statistics (%) <sup>e</sup> |                                                   |
| Favored                                  | 97.3                                              |
| Outliers                                 | 0.7                                               |
| PDB ID                                   | 4G6A                                              |

95 <sup>a</sup> Numbers in parentheses refer to the highest  
 96 resolution shell.

97 <sup>b</sup>  $R_{\text{sym}} = \frac{\sum_{hkl} \sum_i |I_{hkl,i} - \langle I_{hkl} \rangle|}{\sum_{hkl} \sum_i I_{hkl,i}}$ , where  
 98  $I_{hkl,i}$  is the scaled intensity of the  $i^{\text{th}}$  measurement  
 99 of reflection h, k, l,  $\langle I_{hkl} \rangle$  is the average intensity  
 100 for that reflection, and  $n$  is the redundancy (20).

101 <sup>c</sup>  $R_{\text{cryst}} = \frac{\sum_{hkl} |F_o - F_c|}{\sum_{hkl} |F_o|} \times 100$

102 <sup>d</sup>  $R_{\text{free}}$  was calculated as for  $R_{\text{cryst}}$ , but on a test set  
 103 comprising 5% of the data excluded from  
 104 refinement.

105 <sup>e</sup> These values were calculated using Molprobit  
 106 (3).

107

108 **Table S2.** Van der Waals interactions between E2 peptide  
 109 and AP33 Fab 1<sup>a</sup>

| <b>Fab Residue</b>  | <b>Atom<sup>b</sup></b> | <b>Peptide Residue</b> | <b>Atom<sup>b</sup></b> | <b>Distance (Å)</b> |
|---------------------|-------------------------|------------------------|-------------------------|---------------------|
| TYR <sup>H33</sup>  | Cδ2                     | TRP420                 | Cη2                     | 3.9                 |
| TYR <sup>H33</sup>  | Cε1                     | ASN415                 | Cβ                      | 3.8                 |
| TYR <sup>H33</sup>  | Cε2                     | TRP420                 | Cη2                     | 3.6                 |
| TYR <sup>H33</sup>  | Cε2                     | TRP420                 | Cζ3                     | 3.8                 |
| TYR <sup>H33</sup>  | Cζ                      | ASN415                 | N                       | 3.7                 |
| TYR <sup>H33</sup>  | Cζ                      | ASN415                 | Cβ                      | 3.8                 |
| TYR <sup>H33</sup>  | Cζ                      | TRP420                 | Cη2                     | 4.1                 |
| TYR <sup>H33</sup>  | Oη                      | ILE414                 | Cα                      | 3.5                 |
| TYR <sup>H33</sup>  | Oη                      | ILE414                 | C                       | 3.6                 |
| TYR <sup>H33</sup>  | Oη                      | ASN415                 | Cα                      | 3.6                 |
| TYR <sup>H33</sup>  | Oη                      | ASN415                 | Cβ                      | 3.7                 |
| TYR <sup>H33</sup>  | Oη                      | ILE414                 | Cβ                      | 3.8                 |
| TYR <sup>H50</sup>  | Cε1                     | ASN415                 | Oδ1                     | 3.5                 |
| TYR <sup>H50</sup>  | Cζ                      | ASN415                 | Oδ1                     | 3.3                 |
| TYR <sup>H50</sup>  | Oη                      | ASN415                 | Oδ1                     | 2.3                 |
| TYR <sup>H50</sup>  | Oη                      | ASN415                 | Cγ                      | 3.3                 |
| TYR <sup>H50</sup>  | Oη                      | ASN415                 | O                       | 3.5                 |
| TYR <sup>H50</sup>  | Oη                      | ASN415                 | Cβ                      | 3.7                 |
| TYR <sup>H50</sup>  | Oη                      | ASN415                 | C                       | 3.8                 |
| TYR <sup>H58</sup>  | Cδ2                     | ASN417                 | C                       | 3.7                 |
| TYR <sup>H58</sup>  | Cδ2                     | GLY418                 | N                       | 3.8                 |
| TYR <sup>H58</sup>  | Cδ2                     | ASN417                 | Cα                      | 3.9                 |
| TYR <sup>H58</sup>  | Cε1                     | GLY418                 | Cα                      | 3.9                 |
| TYR <sup>H58</sup>  | Cε2                     | ASN417                 | O                       | 3.6                 |
| TYR <sup>H58</sup>  | Cε2                     | ASN417                 | C                       | 3.6                 |
| TYR <sup>H58</sup>  | Cε2                     | GLY418                 | N                       | 3.8                 |
| TYR <sup>H58</sup>  | Cε2                     | GLY418                 | Cα                      | 3.9                 |
| TYR <sup>H58</sup>  | Cζ                      | GLY418                 | Cα                      | 3.7                 |
| TYR <sup>H58</sup>  | Oη                      | GLY418                 | Cα                      | 4.0                 |
| ILE <sup>H95</sup>  | Cγ2                     | TRP420                 | Cζ2                     | 4.2                 |
| ILE <sup>H95</sup>  | Cγ2                     | TRP420                 | Cη2                     | 4.2                 |
| TYR <sup>H100</sup> | Cδ1                     | TRP420                 | Cζ3                     | 3.4                 |
| TYR <sup>H100</sup> | Cδ1                     | TRP420                 | Cε3                     | 3.7                 |
| TYR <sup>H100</sup> | Cδ1                     | TRP420                 | Cη2                     | 3.8                 |
| TYR <sup>H100</sup> | Cε1                     | LEU413                 | Cβ                      | 3.5                 |
| TYR <sup>H100</sup> | Cε1                     | TRP420                 | Cζ3                     | 3.6                 |
| TYR <sup>H100</sup> | Cε1                     | LEU413                 | O                       | 3.7                 |
| TYR <sup>H100</sup> | Cε1                     | TRP420                 | Cε3                     | 3.8                 |
| TYR <sup>H100</sup> | Cε1                     | LEU413                 | Cα                      | 4.1                 |
| TYR <sup>H100</sup> | Cε1                     | LEU413                 | Cδ1                     | 4.1                 |
| TYR <sup>H100</sup> | Cζ                      | LEU413                 | N                       | 3.8                 |
| TYR <sup>H100</sup> | Cζ                      | LEU413                 | Cβ                      | 3.8                 |
| TYR <sup>H100</sup> | Cζ                      | LEU413                 | Cδ1                     | 4.1                 |
| TYR <sup>H100</sup> | Oη                      | GLN412                 | C                       | 3.5                 |
| TYR <sup>H100</sup> | Oη                      | GLN412                 | Cα                      | 3.5                 |

|                     |                |        |              |     |
|---------------------|----------------|--------|--------------|-----|
| TYR <sup>H100</sup> | O $\eta$       | LEU413 | C $\beta$    | 3.6 |
| TYR <sup>H100</sup> | O $\eta$       | LEU413 | C $\alpha$   | 3.7 |
| TYR <sup>H100</sup> | O $\eta$       | LEU413 | C $\gamma$   | 3.9 |
| TYR <sup>L28</sup>  | C $\beta$      | LEU413 | C $\delta$ 2 | 4.3 |
| TYR <sup>L28</sup>  | C $\gamma$     | LEU413 | C $\delta$ 2 | 4.0 |
| TYR <sup>L28</sup>  | C $\delta$ 1   | ILE422 | C $\gamma$ 2 | 3.8 |
| TYR <sup>L28</sup>  | C $\delta$ 2   | LEU413 | C $\delta$ 2 | 4.2 |
| TYR <sup>L28</sup>  | C $\epsilon$ 1 | ILE422 | C $\gamma$ 2 | 3.8 |
| TYR <sup>L28</sup>  | C $\epsilon$ 1 | ILE422 | C $\gamma$ 1 | 3.8 |
| TYR <sup>L28</sup>  | C $\epsilon$ 1 | ILE422 | N            | 3.9 |
| TYR <sup>L28</sup>  | C $\epsilon$ 1 | ILE422 | C $\delta$ 1 | 4.1 |
| TYR <sup>L28</sup>  | C $\epsilon$ 2 | HIS421 | C $\alpha$   | 3.5 |
| TYR <sup>L28</sup>  | C $\epsilon$ 2 | TRP420 | O            | 3.5 |
| TYR <sup>L28</sup>  | C $\epsilon$ 2 | HIS421 | C $\beta$    | 3.8 |
| TYR <sup>L28</sup>  | C $\zeta$      | HIS421 | C $\alpha$   | 3.6 |
| TYR <sup>L28</sup>  | C $\zeta$      | HIS421 | C $\beta$    | 3.7 |
| TYR <sup>L28</sup>  | C $\zeta$      | ILE422 | N            | 3.8 |
| TYR <sup>L28</sup>  | O $\eta$       | HIS421 | C $\beta$    | 3.1 |
| TYR <sup>L28</sup>  | O $\eta$       | HIS421 | C $\alpha$   | 3.6 |
| PHE <sup>L32</sup>  | C $\delta$ 1   | TRP420 | C $\delta$ 1 | 4.2 |
| PHE <sup>L32</sup>  | C $\epsilon$ 1 | TRP420 | C $\delta$ 1 | 4.0 |
| PHE <sup>L32</sup>  | C $\epsilon$ 1 | TRP420 | C $\gamma$   | 4.0 |
| PHE <sup>L32</sup>  | C $\epsilon$ 1 | LEU413 | C $\delta$ 1 | 4.2 |
| PHE <sup>L32</sup>  | C $\zeta$      | LEU413 | C $\delta$ 1 | 3.6 |
| PHE <sup>L32</sup>  | C $\zeta$      | TRP420 | C $\beta$    | 3.8 |
| PHE <sup>L32</sup>  | C $\zeta$      | TRP420 | C $\gamma$   | 4.1 |
| ASN <sup>L91</sup>  | O              | TRP420 | C $\delta$ 1 | 3.1 |
| ASN <sup>L92</sup>  | C $\alpha$     | GLY418 | O            | 3.3 |
| ASN <sup>L92</sup>  | C              | GLY418 | O            | 3.3 |
| ASN <sup>L92</sup>  | O              | GLY418 | O            | 3.5 |
| ASN <sup>L92</sup>  | O              | SER419 | O $\gamma$   | 3.6 |
| ASN <sup>L92</sup>  | O              | SER419 | C $\alpha$   | 3.7 |
| ASN <sup>L92</sup>  | O $\delta$ 1   | TRP420 | C $\delta$ 1 | 3.4 |
| ASN <sup>L92</sup>  | O $\delta$ 1   | TRP420 | C $\beta$    | 3.5 |
| ASN <sup>L92</sup>  | O $\delta$ 1   | TRP420 | C $\alpha$   | 3.8 |
| TRP <sup>L96</sup>  | C $\epsilon$ 2 | GLY418 | O            | 3.8 |
| TRP <sup>L96</sup>  | N $\epsilon$ 1 | GLY418 | C $\alpha$   | 3.6 |
| TRP <sup>L96</sup>  | N $\epsilon$ 1 | GLY418 | C            | 3.7 |
| TRP <sup>L96</sup>  | C $\zeta$ 2    | ASN415 | N $\delta$ 2 | 3.7 |
| TRP <sup>L96</sup>  | C $\zeta$ 2    | GLY418 | O            | 3.9 |

110 <sup>a</sup> Interactions determined by CONTACTSYM (18, 19).  
111 Numbering for the peptide follows the HCV E2 numbering  
112 scheme. Fab numbering follows the Kabat numbering  
113 scheme (12). The capitalized letter in front of the residue  
114 designates heavy chain (H) and light chain (L).

115 <sup>b</sup> Atom involved in interaction.

116  
117

118  
119

120 **Table S3.** Van der Waals interactions between E2 peptide  
 121 and AP33 Fab 2<sup>a</sup>

| <b>Fab Residue</b>  | <b>Atom<sup>b</sup></b> | <b>Peptide Residue</b> | <b>Atom<sup>b</sup></b> | <b>Distance</b> |
|---------------------|-------------------------|------------------------|-------------------------|-----------------|
| TYR <sup>H33</sup>  | Cδ2                     | TRP420                 | Cη2                     | 4.1             |
| TYR <sup>H33</sup>  | Cε1                     | ASN415                 | Cβ                      | 4.0             |
| TYR <sup>H33</sup>  | Cε2                     | TRP420                 | Cη2                     | 3.7             |
| TYR <sup>H33</sup>  | Cε2                     | TRP420                 | Cζ3                     | 3.8             |
| TYR <sup>H33</sup>  | Cζ                      | ASN415                 | N                       | 3.7             |
| TYR <sup>H33</sup>  | Cζ                      | TRP420                 | Cζ3                     | 4.0             |
| TYR <sup>H33</sup>  | Oη                      | ILE414                 | Cα                      | 3.2             |
| TYR <sup>H33</sup>  | Oη                      | ILE414                 | Cβ                      | 3.4             |
| TYR <sup>H33</sup>  | Oη                      | ILE414                 | C                       | 3.6             |
| TYR <sup>H33</sup>  | Oη                      | TRP420                 | Cζ3                     | 3.9             |
| TYR <sup>H33</sup>  | Oη                      | ILE414                 | Cγ2                     | 4.0             |
| TYR <sup>H50</sup>  | Cε1                     | ASN415                 | Oδ1                     | 3.7             |
| TYR <sup>H5</sup>   | Cζ                      | ASN415                 | Oδ1                     | 3.7             |
| TYR <sup>H5</sup>   | Oη                      | ASN415                 | O                       | 3.5             |
| TYR <sup>H5</sup>   | Oη                      | ASN415                 | Cγ                      | 3.6             |
| TYR <sup>H5</sup>   | Oη                      | ASN415                 | Cβ                      | 3.6             |
| TYR <sup>H5</sup>   | Oη                      | ASN415                 | C                       | 3.7             |
| TYR <sup>H53</sup>  | Oη                      | ILE414                 | Cγ2                     | 3.4             |
| TYR <sup>H53</sup>  | Oη                      | ILE414                 | Cβ                      | 3.9             |
| TYR <sup>H58</sup>  | Cγ                      | GLY418                 | N                       | 3.8             |
| TYR <sup>H58</sup>  | Cδ1                     | GLY418                 | Cα                      | 4.1             |
| TYR <sup>H58</sup>  | Cδ2                     | ASN417                 | C                       | 3.5             |
| TYR <sup>H58</sup>  | Cδ2                     | GLY418                 | N                       | 3.6             |
| TYR <sup>H58</sup>  | Cδ2                     | ASN417                 | O                       | 3.7             |
| TYR <sup>H58</sup>  | Cδ2                     | ASN417                 | Cα                      | 3.8             |
| TYR <sup>H58</sup>  | Cδ2                     | GLY418                 | Cα                      | 4.2             |
| TYR <sup>H58</sup>  | Cε1                     | GLY418                 | Cα                      | 3.9             |
| TYR <sup>H58</sup>  | Cε2                     | ASN417                 | O                       | 3.5             |
| TYR <sup>H58</sup>  | Cε2                     | ASN417                 | C                       | 3.6             |
| TYR <sup>H58</sup>  | Cε2                     | GLY418                 | N                       | 3.8             |
| TYR <sup>H58</sup>  | Cε2                     | GLY418                 | Cα                      | 3.9             |
| TYR <sup>H58</sup>  | Cζ                      | GLY418                 | Cα                      | 3.8             |
| ILE <sup>H95</sup>  | Cγ2                     | TRP420                 | Cζ2                     | 4.3             |
| THR <sup>H97</sup>  | Cγ2                     | LEU413                 | O                       | 3.8             |
| TYR <sup>H100</sup> | Cδ1                     | TRP420                 | Cζ3                     | 3.6             |
| TYR <sup>H100</sup> | Cδ1                     | TRP420                 | Cη2                     | 3.6             |
| TYR <sup>H100</sup> | Cδ1                     | TRP420                 | Cε3                     | 3.8             |
| TYR <sup>H100</sup> | Cδ1                     | TRP420                 | Cζ2                     | 3.9             |
| TYR <sup>H100</sup> | Cδ1                     | TRP420                 | Cδ2                     | 4.0             |
| TYR <sup>H100</sup> | Cδ1                     | TRP420                 | Cε2                     | 4.1             |
| TYR <sup>H100</sup> | Cε1                     | TRP420                 | Cζ3                     | 3.7             |
| TYR <sup>H100</sup> | Cε1                     | LEU413                 | Cβ                      | 3.7             |
| TYR <sup>H100</sup> | Cε1                     | TRP420                 | Cε3                     | 3.9             |
| TYR <sup>H100</sup> | Cε1                     | TRP420                 | Cη2                     | 4.2             |
| TYR <sup>H100</sup> | Cζ                      | LEU413                 | Cβ                      | 4.0             |



|                     |                |        |                |     |
|---------------------|----------------|--------|----------------|-----|
| TYR <sup>H100</sup> | O $\eta$       | GLN412 | C $\beta$      | 3.6 |
| TYR <sup>H100</sup> | O $\eta$       | LEU413 | C $\beta$      | 3.6 |
| TYR <sup>H100</sup> | O $\eta$       | LEU413 | C $\alpha$     | 3.9 |
| TYR <sup>H100</sup> | O $\eta$       | LEU413 | C $\gamma$     | 3.9 |
| TYR <sup>H100</sup> | C $\delta$ 1   | ILE422 | C $\gamma$ 1   | 4.1 |
| TYR <sup>L28</sup>  | C $\delta$ 1   | ILE422 | C $\delta$ 1   | 4.1 |
| TYR <sup>L28</sup>  | C $\delta$ 2   | TRP420 | O              | 3.7 |
| TYR <sup>L28</sup>  | C $\epsilon$ 1 | ILE422 | C $\gamma$ 1   | 3.8 |
| TYR <sup>L28</sup>  | C $\epsilon$ 1 | ILE422 | C $\delta$ 1   | 3.8 |
| TYR <sup>L28</sup>  | C $\epsilon$ 2 | TRP420 | O              | 3.3 |
| TYR <sup>L28</sup>  | C $\epsilon$ 2 | HIS421 | C $\alpha$ A   | 4.0 |
| ASN <sup>L30</sup>  | N $\delta$ 2   | LEU413 | C $\delta$ 1   | 3.7 |
| PHE <sup>L32</sup>  | C $\delta$ 1   | TRP420 | C $\delta$ 1   | 3.6 |
| PHE <sup>L32</sup>  | C $\delta$ 1   | TRP420 | N $\epsilon$ 1 | 3.8 |
| PHE <sup>L32</sup>  | C $\epsilon$ 1 | TRP420 | C $\delta$ 1   | 3.4 |
| PHE <sup>L32</sup>  | C $\epsilon$ 1 | TRP420 | C $\gamma$     | 3.7 |
| PHE <sup>L32</sup>  | C $\epsilon$ 1 | TRP420 | N $\epsilon$ 1 | 3.8 |
| PHE <sup>L32</sup>  | C $\epsilon$ 1 | TRP420 | C $\beta$      | 4.2 |
| PHE <sup>L32</sup>  | C $\zeta$      | TRP420 | C $\delta$ 1   | 3.8 |
| PHE <sup>L32</sup>  | C $\zeta$      | TRP420 | C $\beta$      | 3.9 |
| PHE <sup>L32</sup>  | C $\zeta$      | TRP420 | C $\gamma$     | 3.9 |
| PHE <sup>L32</sup>  | C $\zeta$      | LEU413 | C $\delta$ 1   | 4.1 |
| ASN <sup>L91</sup>  | O              | TRP420 | C $\delta$ 1   | 3.3 |
| ASN <sup>L91</sup>  | O              | GLY418 | O              | 3.5 |
| ASN <sup>L92</sup>  | C $\alpha$     | GLY418 | O              | 3.5 |
| ASN <sup>L92</sup>  | C $\alpha$     | TRP420 | C $\delta$ 1   | 4.2 |
| ASN <sup>L92</sup>  | C              | GLY418 | O              | 3.4 |
| ASN <sup>L92</sup>  | O              | SER419 | C $\alpha$     | 3.7 |
| ASN <sup>L92</sup>  | C $\beta$      | TRP420 | C $\delta$ 1   | 4.2 |
| ASN <sup>L92</sup>  | O $\delta$ 1   | TRP420 | C $\delta$ 1   | 3.3 |
| ASN <sup>L92</sup>  | O $\delta$ 1   | TRP420 | C $\beta$      | 3.5 |
| TRP <sup>L96</sup>  | C $\epsilon$ 2 | GLY418 | O              | 3.7 |
| TRP <sup>L96</sup>  | C $\epsilon$ 2 | GLY418 | C $\alpha$     | 4.0 |
| TRP <sup>L96</sup>  | N $\epsilon$ 1 | GLY418 | C $\alpha$     | 3.3 |
| TRP <sup>L96</sup>  | N $\epsilon$ 1 | GLY418 | C              | 3.6 |
| TRP <sup>L96</sup>  | C $\zeta$ 2    | ASN415 | N $\delta$ 2   | 3.7 |
| TRP <sup>L96</sup>  | C $\zeta$ 2    | GLY418 | O              | 3.7 |
| TRP <sup>L96</sup>  | C $\zeta$ 2    | ASN415 | O $\delta$ 1   | 3.9 |
| TRP <sup>L96</sup>  | C $\zeta$ 2    | ASN415 | C $\gamma$     | 4.0 |
| TRP <sup>L96</sup>  | C $\zeta$ 2    | GLY418 | C $\alpha$     | 4.0 |

122 <sup>a</sup> Interactions determined by CONTACSYM (18, 19).  
123 Numbering for the peptide follows the HCV E2 numbering  
124 scheme. Fab numbering follows the Kabat numbering  
125 scheme(12). The capitalized letter in front of the residue  
126 designates heavy chain (H) and light chain (L).

127 <sup>b</sup> Atom involved in interaction.

128

129

130

131 **Table S4.** Hydrogen bond interactions between the E2 peptide and AP33 Fab<sup>a</sup>

| Fab 1           |                        |                     |                        |              | Fab2            |                        |                     |                        |              |
|-----------------|------------------------|---------------------|------------------------|--------------|-----------------|------------------------|---------------------|------------------------|--------------|
| Peptide Residue | Atom Type <sup>b</sup> | Fab Residue         | Atom Type <sup>b</sup> | Distance (Å) | Peptide Residue | Atom Type <sup>b</sup> | Fab Residue         | Atom Type <sup>b</sup> | Distance (Å) |
| LEU413          | N                      | TYR <sup>H100</sup> | O $\eta$               | 2.8          | LEU413          | N                      | TYR <sup>H100</sup> | O $\eta$               | 3.2          |
| ASN415          | O $\delta$ 1           | TYR <sup>H50</sup>  | O $\eta$               | 2.3          | ASN415          | O $\delta$ 1           | TYR <sup>H50</sup>  | O $\eta$               | 2.8          |
| ASN415          | N                      | TYR <sup>H33</sup>  | O $\eta$               | 2.7          | ASN415          | N                      | TYR <sup>H33</sup>  | O $\eta$               | 3.0          |
| TRP420          | N $\epsilon$ 1         | ASN <sup>L91</sup>  | O                      | 2.8          | TRP420          | N $\epsilon$ 1         | ASN <sup>L91</sup>  | O                      | 2.9          |
| TRP420          | N                      | ASN <sup>L92</sup>  | O $\delta$ 1           | 3.1          | TRP420          | N                      | ASN <sup>L92</sup>  | O $\delta$ 1           | 3.2          |
| GLY418          | O                      | TRP <sup>L96</sup>  | N $\epsilon$ 1         | 3.0          | GLY418          | O                      | TRP <sup>L96</sup>  | N $\epsilon$ 1         | 3.0          |

132 <sup>a</sup> Hydrogen bonds determined by HBPLUS (14). Numbering for the peptide follows the E2 numbering  
 133 scheme and numbering for the Fab follows the Kabat scheme (12). The capitalized letter in front of the  
 134 residue designates heavy chain (H) and light chain (L).

135 <sup>b</sup> Atom involved in interaction.

136

137

- 139 1. **Adams, P. D., P. V. Afonine, G. Bunkoczi, V. B. Chen, I. W. Davis, N. Echols, J. J. Headd,**  
140 **L. W. Hung, G. J. Kapral, R. W. Grosse-Kunstleve, A. J. McCoy, N. W. Moriarty, R.**  
141 **Oeffner, R. J. Read, D. C. Richardson, J. S. Richardson, T. C. Terwilliger, and P. H. Zwart.**  
142 2010. PHENIX: a comprehensive Python-based system for macromolecular structure solution.  
143 *Acta Crystallogr. D Biol. Crystallogr.* **66**:213-221.
- 144 2. **Baker, N. A., D. Sept, S. Joseph, M. J. Holst, and J. A. McCammon.** 2001. Electrostatics of  
145 nanosystems: application to microtubules and the ribosome. *Proc. Natl. Acad. Sci. U.S.A.*  
146 **98**:10037-10041.
- 147 3. **Chen, V. B., W. B. Arendall, 3rd, J. J. Headd, D. A. Keedy, R. M. Immormino, G. J.**  
148 **Kapral, L. W. Murray, J. S. Richardson, and D. C. Richardson.** 2010. MolProbity: all-atom  
149 structure validation for macromolecular crystallography. *Acta Crystallogr. D Biol. Crystallogr.*  
150 **66**:12-21.
- 151 4. **Connolly, M. L.** 1993. The molecular surface package. *J. Mol. Graphics* **11**:139-141.
- 152 5. **D'Arcy, A., F. Villard, and M. Marsh.** 2007. An automated microseed matrix-screening method  
153 for protein crystallization. *Acta Crystallogr. D Biol. Crystallogr.* **63**:550-554.
- 154 6. **Emsley, P., B. Lohkamp, W. G. Scott, and K. Cowtan.** 2010. Features and development of  
155 Coot. *Acta Crystallogr. D Biol. Crystallogr.* **66**:486-501.
- 156 7. **Giang, E., M. Dorner, J. C. Prentoe, M. Dreux, M. J. Evans, J. Bukh, C. M. Rice, A. Ploss,**  
157 **D. R. Burton, and M. Law.** 2012. Human broadly neutralizing antibodies to the envelope  
158 glycoprotein complex of hepatitis C virus. *Proc. Natl. Acad. Sci. U.S.A.*
- 159 8. **Ireton, G. C., and B. L. Stoddard.** 2004. Microseed matrix screening to improve crystals of  
160 yeast cytosine deaminase. *Acta Crystallogr. D Biol. Crystallogr.* **60**:601-605.
- 161 9. **Kong, L., E. Giang, J. B. Robbins, R. L. Stanfield, D. R. Burton, I. A. Wilson, and M. Law.**  
162 2012. Structural basis of hepatitis C virus neutralization by broadly neutralizing antibody HCV1.  
163 *Proc. Natl. Acad. Sci. U.S.A.* **109**:9499-9504.
- 164 10. **Law, M., T. Maruyama, J. Lewis, E. Giang, A. W. Tarr, Z. Stamatakis, P. Gastaminza, F. V.**  
165 **Chisari, I. M. Jones, R. I. Fox, J. K. Ball, J. A. McKeating, N. M. Kneteman, and D. R.**  
166 **Burton.** 2008. Broadly neutralizing antibodies protect against hepatitis C virus quasispecies  
167 challenge. *Nat. Med.* **14**:25-27.
- 168 11. **Lesley, S. A., P. Kuhn, A. Godzik, A. M. Deacon, I. Mathews, A. Kreuzsch, G. Spraggon, H.**  
169 **E. Klock, D. McMullan, T. Shin, J. Vincent, A. Robb, L. S. Brinen, M. D. Miller, T. M.**  
170 **McPhillips, M. A. Miller, D. Scheibe, J. M. Canaves, C. Guda, L. Jaroszewski, T. L. Selby,**  
171 **M. A. Elsliger, J. Wooley, S. S. Taylor, K. O. Hodgson, I. A. Wilson, P. G. Schultz, and R. C.**  
172 **Stevens.** 2002. Structural genomics of the *Thermotoga maritima* proteome implemented in a  
173 high-throughput structure determination pipeline. *Proc. Natl. Acad. Sci. U.S.A.* **99**:11664-11669.
- 174 12. **Martin, A. C.** 1996. Accessing the Kabat antibody sequence database by computer. *Proteins*  
175 **25**:130-133.
- 176 13. **McCoy, A. J., R. W. Grosse-Kunstleve, P. D. Adams, M. D. Winn, L. C. Storoni, and R. J.**  
177 **Read.** 2007. Phaser crystallographic software. *J. Appl. Crystallogr.* **40**:658-674.
- 178 14. **McDonald, I. K., and J. M. Thornton.** 1994. Satisfying hydrogen bonding potential in proteins.  
179 *J. Mol. Biol.* **238**:777-793.
- 180 15. **Otwinowski, Z., and W. Minor.** 1997. Processing of X-ray diffraction data collected in  
181 oscillation mode. *Meth. Enzymol.* **276A**:307-326.
- 182 16. **Owsianka, A., R. F. Clayton, L. D. Loomis-Price, J. A. McKeating, and A. H. Patel.** 2001.  
183 Functional analysis of hepatitis C virus E2 glycoproteins and virus-like particles reveals structural  
184 dissimilarities between different forms of E2. *J. Gen. Virol.* **82**:1877-1883.
- 185 17. **Santarsiero, B. D., D. T. Yegian, C. C. Lee, G. Spraggon, J. Gu, D. Scheibe, D. C. Uber, E.**  
186 **W. Cornell, R. A. Nordmeyer, W. F. Kolbe, J. Jin, A. L. Jones, J. M. Jaklevic, P. G. Schultz,**

187           **and R. C. Stevens.** 2002. An approach to rapid protein crystallization using nanodroplets. *J.*  
188           *Appl. Crystallogr.* **35**:278-281.

189 18.       **Sheriff, S., W. A. Hendrickson, and J. L. Smith.** 1987. Structure of myohemerythrin in the  
190           azidomet state at 1.7/1.3 Å resolution. *J. Mol. Biol.* **197**:273-296.

191 19.       **Sheriff, S., E. W. Silverton, E. A. Padlan, G. H. Cohen, S. J. Smith-Gill, B. C. Finzel, and D.**  
192           **R. Davies.** 1987. Three-dimensional structure of an antibody-antigen complex. *Proc. Natl. Acad.*  
193           *Sci. U.S.A.* **84**:8075-8079.

194 20.       **Weiss, M. S., and R. Hilgenfeld.** 1997. On the use of the merging R factor as a quality indicator  
195           for X-ray data. *J. Appl. Crystallogr.* **30**:203-205.

196

197
